# Supplementary material for: Inadequate Intake of Dietary Fibre in Adolescents, Adults, and Elderlies: Results of Slovenian Representative SI. Menu Study
Source: MDPI journal article supplement (doi:10.3390/nu13113826), 2021-10-27
Supplement: s1 [file s1]

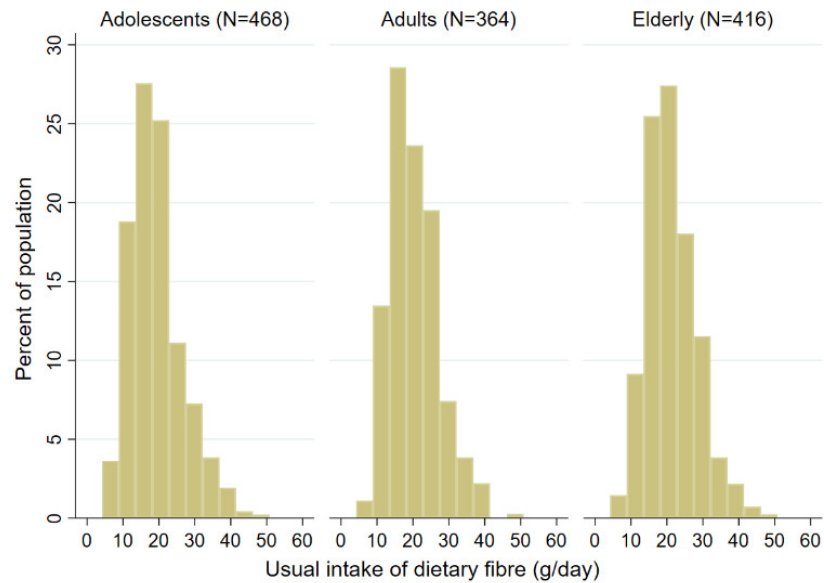

**Supplementary Figure S1.** Histogram of distribution of daily dietary fibre intakes for different age groups (Adolescents: age 10-17 years; Adults: age 18-64 years; Elderly: age 65-74 years).

**Supplementary Table S1.** Relative contribution of selected food categories to usual daily dietary fibre intake among different age groups (% of total dietary fibre intake).

| Food categories                         | Food category contribution in total dietary fibre daily diet (%) |                |                 |
|-----------------------------------------|------------------------------------------------------------------|----------------|-----------------|
|                                         | Adolescents (10-17)                                              | Adults (18-64) | Elderly (65-74) |
| <b>Fruit and vegetables</b>             | <b>41.94</b>                                                     | <b>49.66</b>   | <b>52.57</b>    |
| Vegetables                              | 24.74                                                            | 28.60          | 30.45           |
| <i>Fresh vegetables</i>                 | 22.22                                                            | 25.22          | 27.19           |
| <i>Canned vegetables</i>                | 2.52                                                             | 3.37           | 3.27            |
| Fruit                                   | 14.58                                                            | 16.56          | 18.98           |
| <i>Fresh fruit</i>                      | 13.54                                                            | 15.11          | 17.05           |
| <i>Canned fruit</i>                     | 1.04                                                             | 1.45           | 1.92            |
| <i>Dried fruit</i>                      | 0.72                                                             | 0.99           | 1.03            |
| Nuts and seeds                          | 2.20                                                             | 4.13           | 2.56            |
| Jam and spreads                         | 0.42                                                             | 0.38           | 0.58            |
| <b>Bread and bakery products</b>        | <b>31.00</b>                                                     | <b>29.73</b>   | <b>31.37</b>    |
| Bread                                   | 24.26                                                            | 25.31          | 27.47           |
| <i>White bread</i>                      | 16.13                                                            | 14.35          | 13.56           |
| <i>Brown bread</i>                      | 8.13                                                             | 10.96          | 13.91           |
| Biscuits                                | 2.74                                                             | 1.87           | 1.49            |
| Cakes, muffins and pastry               | 4.01                                                             | 2.55           | 2.41            |
| <b>Cereal and cereal products</b>       | <b>14.01</b>                                                     | <b>10.71</b>   | <b>7.66</b>     |
| Breakfast cereals & unprocessed cereals | 8.26                                                             | 5.93           | 4.38            |
| Cereal bars                             | 0.61                                                             | 0.25           | 0.01            |
| Pasta                                   | 4.46                                                             | 4.10           | 2.82            |
| Rice                                    | 0.68                                                             | 0.43           | 0.46            |
| <b>Convenience foods</b>                | <b>3.25</b>                                                      | <b>2.64</b>    | <b>2.43</b>     |
| <b>Snack foods</b>                      | <b>2.68</b>                                                      | <b>1.26</b>    | <b>0.38</b>     |
| <b>Other</b>                            | <b>11.74</b>                                                     | <b>10.04</b>   | <b>9.39</b>     |
